# Supplementary material for: Boosting ethanol electrooxidation at RhBi alloy and Bi2O3 composite surfaces in alkaline media
Source: Royal Society of Chemistry journal article supplement (doi:10.1039/d2ta06062k), 2022-01-01
Supplement: d2ta06062k1.pdf [file d2ta06062k1.pdf]

***Supplementary Materials for***

**Boosting Ethanol Electrooxidation at RhBi Alloy and Bi<sub>2</sub>O<sub>3</sub> Composite Surfaces in Alkaline Media**

Yue Liu,<sup>a</sup> Bing Lan,<sup>a</sup> Yao-Yue Yang<sup>\*a</sup>

*<sup>a</sup>Key Laboratory of General Chemistry of State Ethnic Affairs Commission, School of Chemistry and Environment, Southwest Minzu University, Chengdu, 610041, Sichuan Province, China.*

*\*Corresponding author, E-mail: [yaoyueyoung@swun.edu.cn](mailto:yaoyueyoung@swun.edu.cn), ORCID ID: 0000-0002-4573-9437*

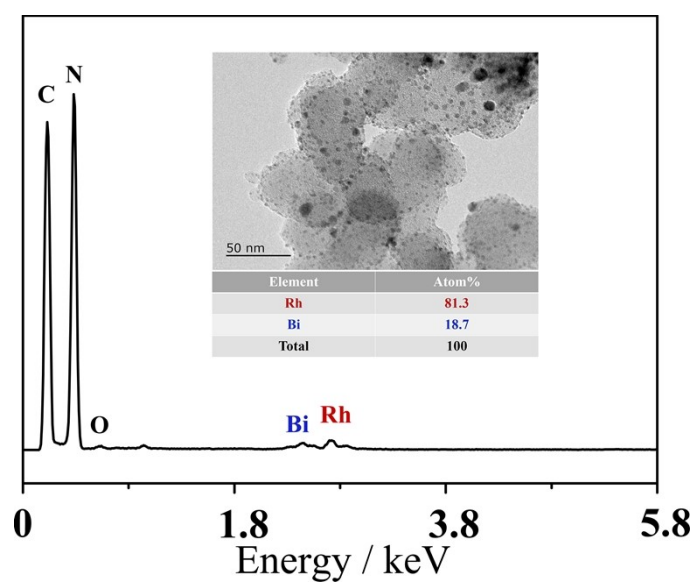

**Figure S1.** The typical energy-dispersive X-ray spectral (EDX) profile of RhBi-Bi<sub>2</sub>O<sub>3</sub> catalysts which collected on randomly selected area during the corresponding transmission electron microscopy (TEM) characterization (the inset).

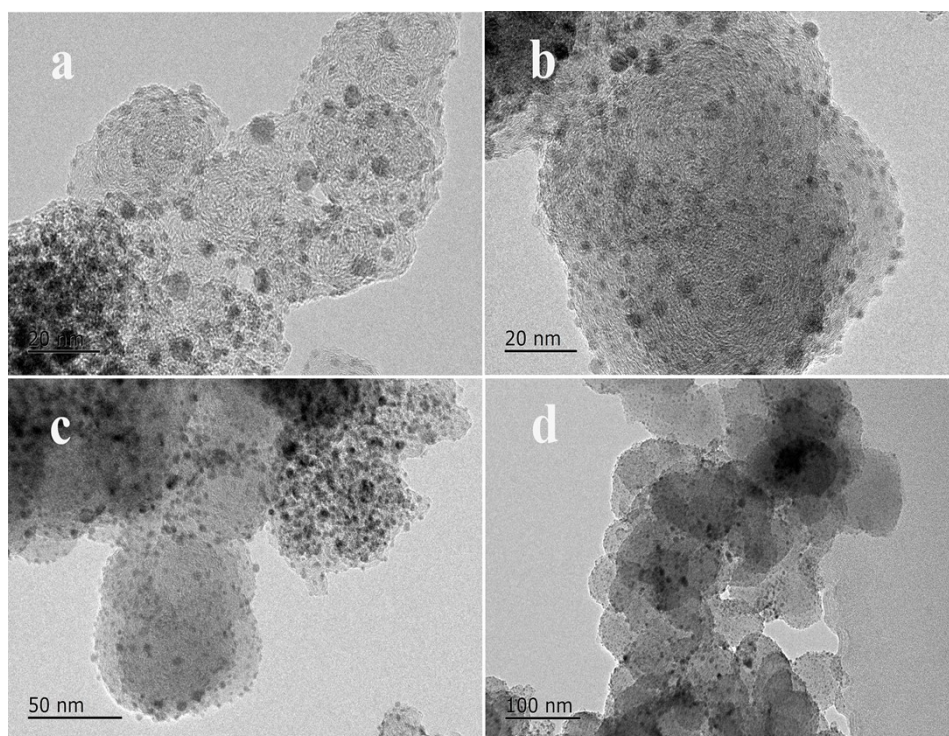

**Figure S2.** Typical HR-TEM images of the RhBi-Bi<sub>2</sub>O<sub>3</sub> sample at different scales.

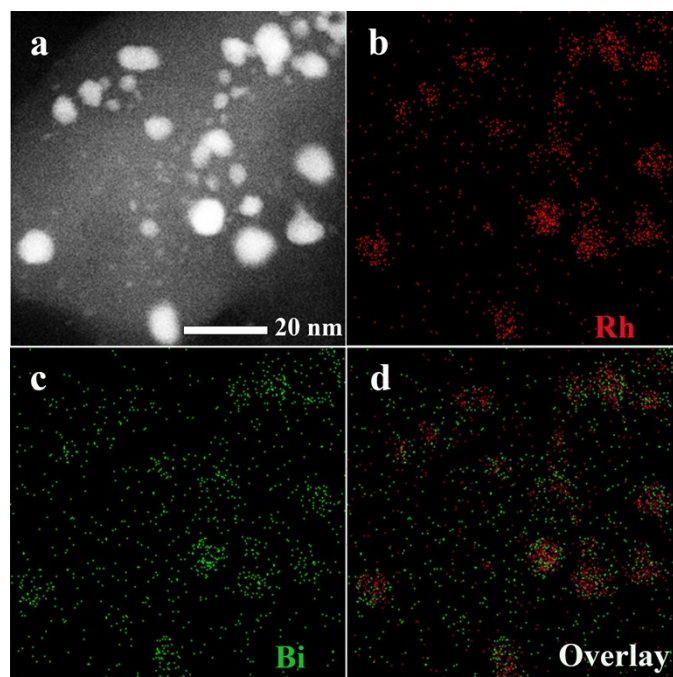

**Figure S3.** (a) High-angle annular dark field (HAADF) STEM image and (b-d) elemental mapping analysis of Rh and Bi elements for the RhBi-Bi<sub>2</sub>O<sub>3</sub> sample.

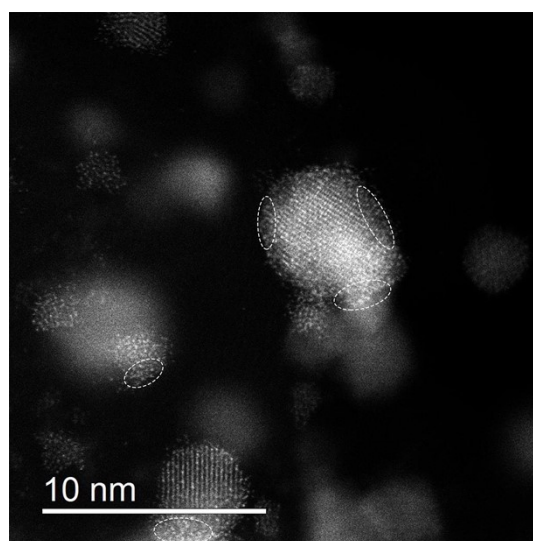

**Figure S4.** Typical High-resolution HAADF-STEM image of the as-prepared RhBi-Bi<sub>2</sub>O<sub>3</sub> sample, and the flocculent structures are labeled by the white cycles.

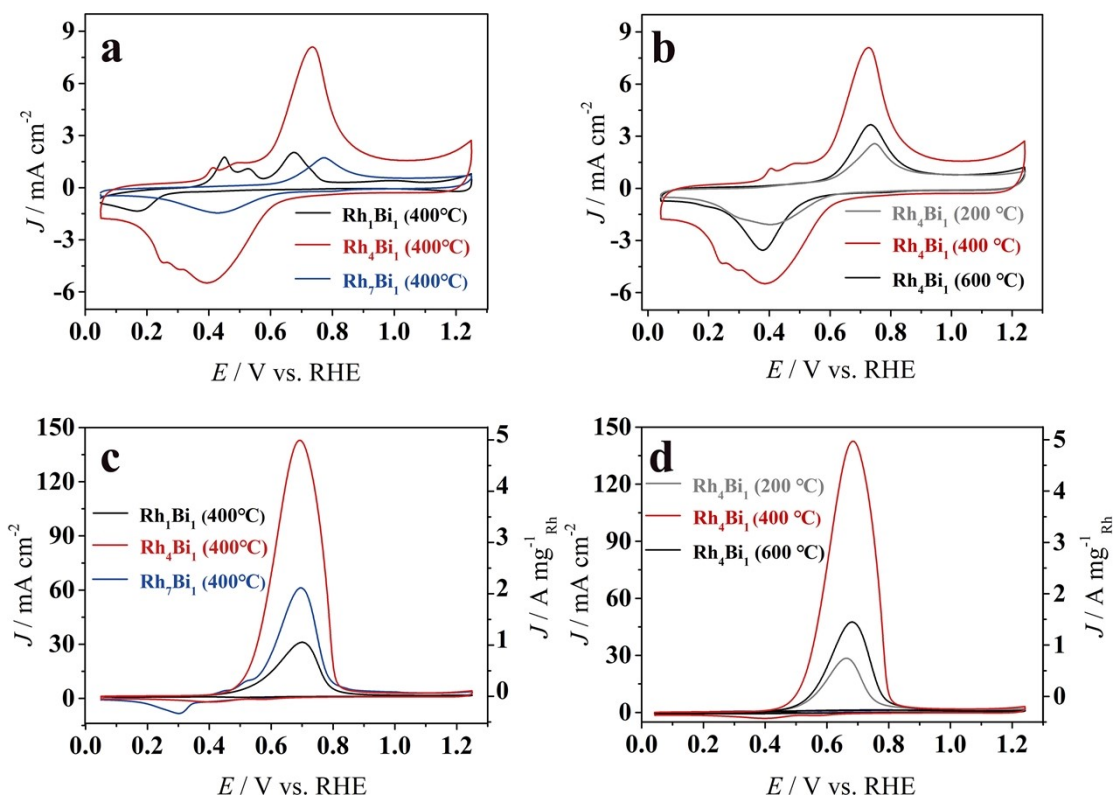

**Figure S5.** Cyclic voltammograms (CVs) collected on the Rh-based catalysts surfaces with different (a) Rh-to-Bi molar ratio and (b) annealing temperatures in 1 M NaOH and the corresponding CVs collected in 1 M NaOH+1 M C<sub>2</sub>H<sub>5</sub>OH solution (c-d) at the rate of 50 mV·s<sup>-1</sup>.

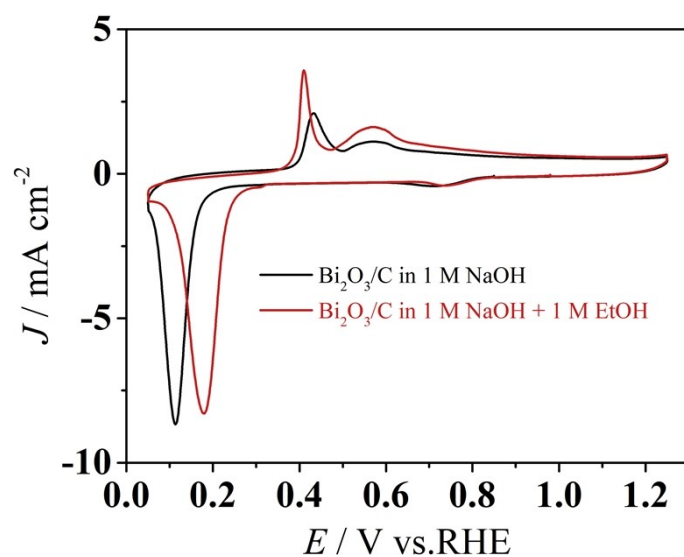

**Figure S6.** Cyclic voltammograms collected on the Bi<sub>2</sub>O<sub>3</sub>/C catalysts surfaces in 1 M NaOH and in 1 M NaOH + 1 M CH<sub>3</sub>CH<sub>2</sub>OH at the rate of 50 mV·s<sup>-1</sup>.

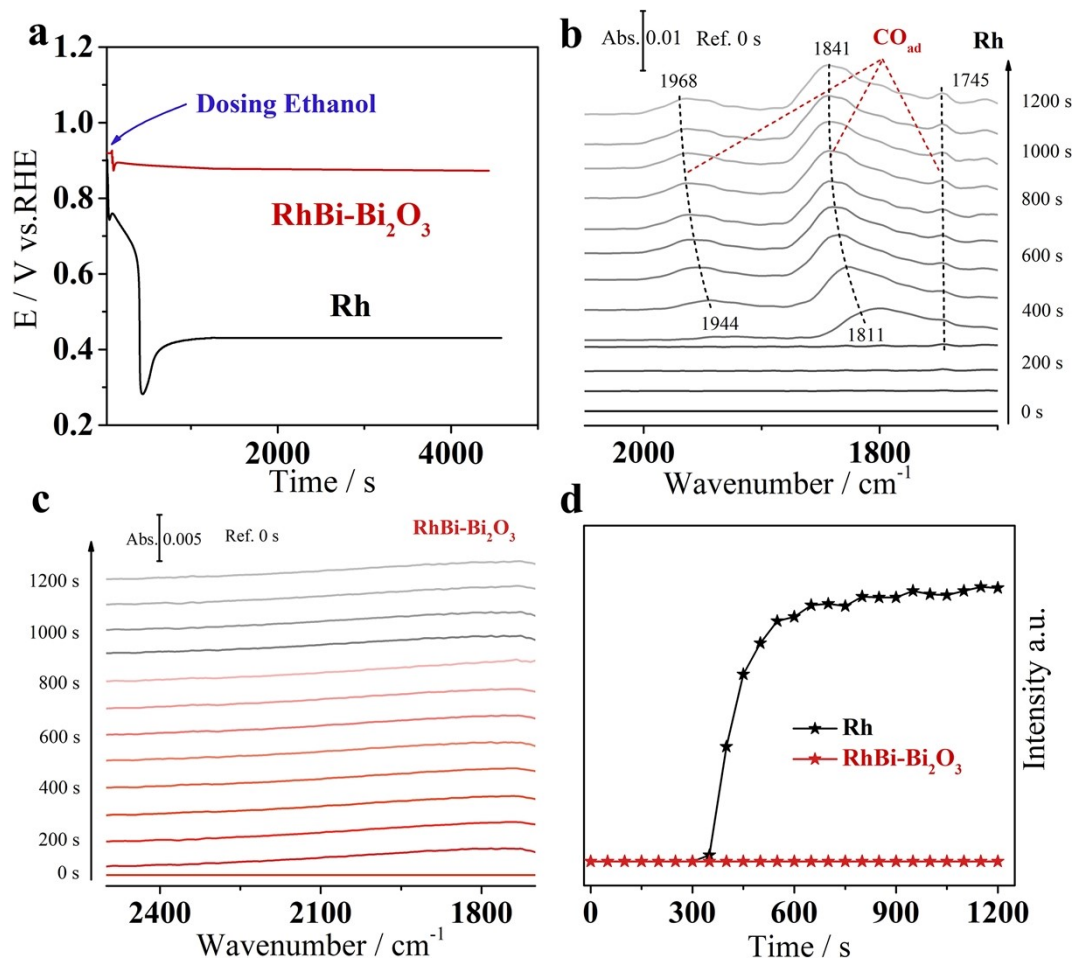

**Figure S7.** (a) OCP-t curves for the Rh and RhBi-Bi<sub>2</sub>O<sub>3</sub> coated electrode in 0.1 M NaOH solution with the ethanol dosing at ca. 0 s. (b) and (c) respectively show the in situ electrochemical ATR-IR spectra collected on Rh and RhBi-Bi<sub>2</sub>O<sub>3</sub> samples with ethanol injecting as described in (a), taken the single spectrum at 0 s as the reference spectrum. The corresponding potential-dependent band intensity variation of CO<sub>ad</sub> species shown in (d). Spectral resolution is 8 cm<sup>-1</sup>.

**Table S1.** A summary of the EOR activity and durability on Rh-based electrocatalysts surface in alkaline solution.

| Sample                                      | Electrolyte                                           | Mass Activity<br>(mA·mg <sub>Rh</sub> <sup>-1</sup> ) | stability                                  | References |
|---------------------------------------------|-------------------------------------------------------|-------------------------------------------------------|--------------------------------------------|------------|
| RhBi-Bi <sub>2</sub> O <sub>3</sub>         | 1 M NaOH +1<br>M C <sub>2</sub> H <sub>5</sub> OH     | 5000                                                  | 53.7 % activity<br>retention after 10000 s | This work  |
| Rh/C                                        | 1 M NaOH +1<br>M C <sub>2</sub> H <sub>5</sub> OH     | 60                                                    | 0 % activity retention<br>after 10000 s    | This work  |
| Rh-Bi(OH) <sub>3</sub> /C                   | 1 M NaOH +1<br>M C <sub>2</sub> H <sub>5</sub> OH     | 3500                                                  | 34% activity retention<br>after 7200 s     | 1          |
| RhPb-PbO <sub>2</sub> /C                    | 1 M NaOH +1<br>M C <sub>2</sub> H <sub>5</sub> OH     | 2636                                                  | 34% activity retention<br>after 30000 s    | 2          |
| SnO <sub>2</sub> -Rh<br>nanosheets          | 0.1 M KOH +<br>0.5 M C <sub>2</sub> H <sub>5</sub> OH | 213.2                                                 | 46% activity retention<br>after 3600 s     | 3          |
| Excavated RhNi<br>Nanobranches              | 1 M NaOH +1<br>M C <sub>2</sub> H <sub>5</sub> OH     | 159.0                                                 | 35% activity retention<br>after 10000 s    | 4          |
| Hollow porous Rh<br>nanoballs               | 1 M NaOH +1<br>M C <sub>2</sub> H <sub>5</sub> OH     | 78.6                                                  | 10% activity retention<br>after 3600 s     | 5          |
| Cyclic Penta-<br>Twinned<br>Rh nanobranches | 1 M NaOH +1<br>M C <sub>2</sub> H <sub>5</sub> OH     | 185.3                                                 | 75% activity retention<br>after 1200 s     | 6          |
| Porous PdRh<br>nanobowls                    | 1 M KOH +1 M<br>C <sub>2</sub> H <sub>5</sub> OH      | 682.1                                                 | 58% activity retention<br>after 12000 s    | 7          |
| Rh-on-Pd<br>nanodendrites                   | 1 M KOH +1 M<br>C <sub>2</sub> H <sub>5</sub> OH      | 30.1-102.8                                            | 53.7%                                      | 8          |

**Table S2.** A summary of the *ECSA* and Peak Mass Activity on RhBi-Bi<sub>2</sub>O<sub>3</sub>,Pd/C-JM and Rh/C catalysts surface in alkaline solution.

| Sample                              | <i>ECSA</i><br>(cm <sup>-2</sup> ug <sup>-1</sup> ) | Peak Mass Activity<br>(mA mg <sup>-1</sup> Rh) |
|-------------------------------------|-----------------------------------------------------|------------------------------------------------|
| RhBi-Bi <sub>2</sub> O <sub>3</sub> | 40.41                                               | 5000                                           |
| Pd/C-JM                             | 10.63                                               | 2000                                           |
| Rh/C                                | 6.06                                                | 60                                             |

## References

1. B. Lan, Q. L. Wang, Z. X. Ma, Y. J. Wu, X. L. Jiang, W. S. Jia, C. X. Zhou and Y. Y. Yang, *Appl. Catal. B-Environ.*, 2022, **300**, 120728-120734.
2. B. Lan, M. Huang, R. L. Wei, C. N. Wang, Q. L. Wang and Y. Y. Yang, *Small*, 2020, **16**, 2004380-2004385.
3. S. X. Bai, Y. Xu, K. L. Cao and X. Q. Huang, *Adv. Mater.*, 2021, **33**, 2005767-2005777.
4. H. Q. Li, J. Y. Ye, X. M. Li, J. W. Zhang, Y. F. Zhu, Z. Y. Zhou, Y. K. Xue, Y. Q. Jiang, Z. X. Xie and L. S. Zheng, *J. Mater. Chem. A*, 2019, **7**, 26266-26271.
5. J. W. Zhang, Y. T. Jiang, S. L. Shi, H. Q. Li, J. Y. Chen, Q. Kuang, Z. X. Xie and L. S. Zheng, *Chem. Commun.*, 2019, **55**, 4989-4992.
6. J. W. Zhang, J. Y. Ye, Q. Y. Fan, Y. T. Jiang, Y. F. Zhu, H. Q. Li, Z. M. Cao, Q. Kuang, J. Cheng, J. Zheng and Z. X. Xie, *J. Am. Chem. Soc.*, 2018, **140**, 11232-11240.
7. Z. J. Li, Y. F. Chen, G. T. Fu, Y. Chen, D. M. Sun, J. M. Lee and Y. W. Tang, *Nanoscale*, 2019, **11**, 2974-2980.
8. S. Y. Shen and T. S. Zhao, *J. Mater. Chem. A*, 2013, **1**, 906-912.
